# Supplementary material for: Lifetime recreational physical activity and the risk of prostate cancer
Source: Springer Nature journal article supplement (doi:10.1007/s10552-019-01138-6), 2019-04-08
Supplement: MOESM1 [file 16629326]

**SUPPLEMENTARY MATERIAL**

**Lifetime recreational physical activity and the risk of prostate cancer**

Elizabeth Sorial1, Si Si1, Lin Fritschi1, Ellie Darcey1,2, Justine E. Leavy1, Jennifer Girschik3,4, Gina L. Ambrosini4, Terry Boyle1,5

1. School of Public Health, Curtin University, Perth, Australia

2. Centre for Genetic Origins of Health and Disease, School of Biomedical Science, Curtin University and The University of Western Australia, Perth, Western Australia, Australia

3. Epidemiology Branch, Department of Health Western Australia, Perth, Australia

4. School of Population and Global Health, The University of Western Australia, Perth, Australia

5. Australian Centre for Precision Health, School of Health Sciences, University of South Australia Cancer Research Institute, Adelaide, Australia

**Corresponding Author:**

Dr Terry Boyle

Australian Centre for Precision Health, School of Health Sciences

University of South Australia Cancer Research Institute

GPO Box 2471, Adelaide SA 5001

**Email**: terry.boyle@unisa.edu.au

**Telephone:** +61 8 8302 1143

**Online Resource 1. Associations between recreational physical activity in specific age-periods and over the lifetime and the risks of low grade and medium-to-high grade prostate cancers in the Western Australia Prostate Health Study**

|  | All Cancers  (569 cases) | Low Grade  (235 cases) | Medium-to-High Grade (315 cases) |
| --- | --- | --- | --- |
| Categories of MET-Hours per week | AOR (95%CI)a | AOR (95%CI)a | AOR (95%CI)a |
| *12 TO 18 YEARS OF AGE* |  |  |  |
| Total physical activity |  |  |  |
| 0-7.9 | 1.00 (Reference) |  |  |
| 8-26.9 | 1.13 (0.78-1.66) | 1.13 (0.69-1.84) | 1.11 (0.70-1.73) |
| 27-59.9 | 1.41 (0.97-2.05) | 1.24 (0.76-2.02) | 1.56 (1.02-2.40) |
| 60+ | 1.36 (0.94-1.98) | 1.43 (0.89-2.30) | 1.28 (0.82-1.99) |
| *PTrend* | *0.057* | *0.116* | *0.124* |
| Moderate-intensity physical activity |  |  |  |
| 0 | 1.00 (Reference) |  |  |
| 0.1-9.9 | 1.11 (0.80-1.54) | 0.91 (0.59-1.41) | 1.28 (0.88-1.86) |
| 10+ | 1.27 (0.90-1.79) | 1.34 (0.88-2.05) | 1.25 (0.83-1.86) |
| *PTrend* | *0.164* | *0.230* | *0.220* |
| Vigorous-intensity physical activity |  |  |  |
| 0-4.9 | 1.00 (Reference) |  |  |
| 5-21.9 | 1.13 (0.78-1.65) | 1.14 (0.71-1.83) | 1.08 (0.70-1.68) |
| 22-49.9 | 1.08 (0.74-1.57) | 1.00 (0.62-1.63) | 1.15 (0.74-1.77) |
| 50+ | 1.03 (0.70-1.52) | 1.05 (0.64-1.72) | 0.98 (0.62-1.54) |
| *PTrend* | *0.964* | *0.999* | *0.976* |
| *19 TO 34 YEARS OF AGE* |  |  |  |
| Total physical activity |  |  |  |
| 0-5.9 | 1.00 (Reference) |  |  |
| 6-19.9 | 0.82 (0.57-1.19) | 0.75 (0.47-1.20) | 0.88 (0.57-1.36) |
| 20-40.9 | 0.71 (0.47-1.05) | 0.68 (0.41-1.12) | 0.74 (0.47-1.17) |
| 41+ | 0.67 (0.44-1.01) | 0.57 (0.34-0.98) | 0.74 (0.45-1.20) |
| *PTrend* | *0.044* | *0.042* | *0.161* |
| Moderate-intensity physical activity |  |  |  |
| 0 | 1.00 (Reference) |  |  |
| 0.1-10.9 | 0.91 (0.65-1.28) | 0.76 (0.49-1.17) | 1.06 (0.71-1.57) |
| 11+ | 1.06 (0.75-1.51) | 0.99 (0.64-1.53) | 1.16 (0.77-1.73) |
| *PTrend* | *0.693* | *0.983* | *0.479* |
| Vigorous-intensity physical activity |  |  |  |
| 0-0.9 | 1.00 (Reference) |  |  |
| 1-8.9 | 0.97 (0.67-1.41) | 1.03 (0.64-1.65) | 0.92 (0.60-1.41) |
| 9-22.9 | 0.63 (0.43-0.93) | 0.70 (0.43-1.14) | 0.57 (0.36-0.89) |
| 23+ | 0.67 (0.45-1.01) | 0.62 (0.37-1.04) | 0.71 (0.44-1.13) |
| *PTrend* | *0.013* | *0.029* | *0.041* |
| *35 TO 49 YEARS OF AGE* |  |  |  |
| Total physical activity |  |  |  |
| 0-5.9 | 1.00 (Reference) |  |  |
| 6-17.9 | 0.77 (0.52-1.14) | 0.69 (0.42-1.13) | 0.81 (0.51-1.28) |
| 18-34.9 | 0.98 (0.65-1.49) | 0.96 (0.57-1.62) | 1.01 (0.62-1.64) |
| 35+ | 0.94 (0.61-1.46) | 0.75 (0.43-1.32) | 1.15 (0.69-1.90) |
| *PTrend* | *0.924* | *0.576* | *0.424* |
| Moderate-intensity physical activity |  |  |  |
| 0-0.9 | 1.00 (Reference) |  |  |
| 1-9.9 | 0.70 (0.47-1.04) | 0.81 (0.49-1.35) | 0.64 (0.39-1.03) |
| 10-25.9 | 1.27 (0.87-1.87) | 1.39 (0.86-2.24) | 1.15 (0.74-1.80) |
| 26+ | 1.04 (0.69-1.58) | 0.86 (0.50-1.49) | 1.27 (0.79-2.04) |
| *PTrend* | *0.329* | *0.828* | *0.123* |
| Vigorous-intensity physical activity |  |  |  |
| 0 | 1.00 (Reference) |  |  |
| 0.1-7.4 | 0.54 (0.38-0.77) | 0.55 (0.35-0.86) | 0.51 (0.34-0.78) |
| 7.5+ | 0.87 (0.61-1.23) | 0.71 (0.45-1.12) | 0.99 (0.66-1.48) |
| *PTrend* | *0.258* | *0.091* | *0.729* |
| *50+ YEARS OF AGE* |  |  |  |
| Total physical activity |  |  |  |
| 0.7.4 | 1.00 (Reference) |  |  |
| 7.5-23.4 | 1.27 (0.86-1.88) | 1.52 (0.93-2.47) | 1.17 (0.74-1.85) |
| 23.5-43.9 | 0.96 (0.63-1.47) | 0.90 (0.52-1.55) | 0.99 (0.60-1.62) |
| 44+ | 0.98 (0.62-1.55) | 0.84 (0.47-1.52) | 1.13 (0.67-1.91) |
| *PTrend* | *0.636* | *0.281* | *0.824* |
| Moderate-intensity physical activity |  |  |  |
| 0-3.9 | 1.00 (Reference) |  |  |
| 4-15.9 | 1.34 (0.91-1.99) | 1.35 (0.83-2.20) | 1.35 (0.85-2.13) |
| 16-33.9 | 1.11 (0.73-1.67) | 1.05 (0.62-1.76) | 1.11 (0.69-1.81) |
| 34+ | 1.18 (0.77-1.82) | 1.07 (0.62-1.87) | 1.26 (0.76-2.10) |
| *PTrend* | *0.677* | *0.979* | *0.547* |
| Vigorous-intensity physical activity |  |  |  |
| 0 | 1.00 (Reference) |  |  |
| 0.1-9.3 | 0.83 (0.58-1.19) | 0.77 (0.48-1.23) | 0.92 (0.61-1.38) |
| 9.4+ | 0.91 (0.64-1.31) | 0.91 (0.58-1.45) | 0.94 (0.62-1.43) |
| *PTrend* | *0.503* | *0.559* | *0.731* |
| *LIFETIME* |  |  |  |
| Total physical activity |  |  |  |
| 0-11.9 | 1.00 (Reference) |  |  |
| 12-22.9 | 1.04 (0.72-1.50) | 1.08 (0.68-1.72) | 1.04 (0.67-1.59) |
| 23-38.4 | 0.80 (0.55-1.16) | 0.80 (0.49-1.29) | 0.77 (0.50-1.20) |
| 38.5+ | 1.10 (0.77-1.59) | 0.97 (0.61-1.55) | 1.21 (0.79-1.84) |
| *PTrend* | *0.893* | *0.614* | *0.589* |
| Moderate-intensity physical activity |  |  |  |
| 0-4.4 | 1.00 (Reference) |  |  |
| 4.5-11.4 | 1.13 (0.78-1.63) | 1.15 (0.72-1.84) | 1.15 (0.76-1.76) |
| 11.5-22.9 | 1.04 (0.72-1.51) | 1.31 (0.82-2.10) | 0.82 (0.52-1.27) |
| 23+ | 1.16 (0.79-1.72) | 1.02 (0.61-1.71) | 1.30 (0.83-2.03) |
| PTrend | 0.564 | *0.731* | *0.535* |
| Vigorous-intensity physical activity |  |  |  |
| 0-2.9 | 1.00 (Reference) |  |  |
| 3-8.9 | 1.03 (0.71-1.49) | 1.16 (0.72-1.84) | 0.96 (0.62-1.49) |
| 9-18.9 | 0.77 (0.52-1.12) | 0.73 (0.44-1.20) | 0.77 (0.49-1.20) |
| 19+ | 0.97 (0.66-1.44) | 0.96 (0.58-1.59) | 1.00 (0.64-1.58) |
| *PTrend* | *0.541* | *0.423* | *0.782* |

**Abbreviations:** AOR, Adjusted Odds Ratio; MET, Metabolic Equivalent; OR, Odds Ratio

a Adjusted for age-group, alcohol consumption 10 years ago, family history of prostate cancer, body mass index 10 years ago, smoking status, index of relative socioeconomic disadvantage, energy intake 10 years ago, lifetime occupational physical activity, and total recreational physical activity in all previous age periods. Moderate and vigorous intensity physical activity and resistance training were mutually adjusted.

**Online Resource 2. Association between weight training and the risks of low grade and medium-to-high grade prostate cancers in the Western Australia Prostate Health Study**

|  | All Cancers  (569 cases) | Low Grade  (235 cases) | Medium-to-High Grade (315 cases) |
| --- | --- | --- | --- |
| Categories of MET-Hours per week | AOR (95%CI)a | AOR (95%CI)a | AOR (95%CI)a |
| *12 TO 18 YEARS OF AGE* |  |  |  |
| 0 | 1.00 (Reference) |  |  |
| 0.1-4.4 | 1.29 (0.62-2.69) | 1.09 (0.41-2.92) | 1.39 (0.62-3.13) |
| 4.5+ | 1.25 (0.59-2.65) | 1.28 (0.51-3.23) | 1.14 (0.47-2.78) |
| *PTrend* | *0.426* | *0.584* | *0.547* |
| *19 TO 34 YEARS OF AGE* |  |  |  |
| 0 | 1.00 (Reference) |  |  |
| 0.1-4.9 | 1.00 (0.54-1.87) | 1.17 (0.54-2.53) | 0.95 (0.46-1.96) |
| 5+ | 0.71 (0.37-1.38) | 0.63 (0.25-1.58) | 0.71 (0.33-1.55) |
| *PTrend* | *0.379* | *0.486* | *0.403* |
| *35 TO 49 YEARS OF AGE* |  |  |  |
| 0 | 1.00 (Reference) |  |  |
| 0.1-5.9 | 0.64 (0.31-1.33) | 0.43 (0.15-1.26) | 0.85 (0.38-1.89) |
| 6+ | 0.68 (0.32-1.41) | 0.95 (0.38-2.34) | 0.49 (0.20-1.22) |
| *PTrend* | *0.153* | *0.457* | *0.134* |
| *50+ YEARS OF AGE* |  |  |  |
| 0 | 1.00 (Reference) |  |  |
| 0.1-5.4 | 0.90 (0.48-1.67) | 0.44 (0.16-1.23) | 1.09 (0.56-2.15) |
| 5.5+ | 0.58 (0.30-1.14) | 0.49 (0.19-1.24) | 0.61 (0.28-1.31) |
| *PTrend* | *0.125* | *0.049* | *0.311* |
| *LIFETIME* |  |  |  |
| 0 | 1.00 (Reference) |  |  |
| 0.1-1.4 | 1.07 (0.69-1.65) | 1.07 (0.62-1.87) | 1.05 (0.64-1.73) |
| 1.5+ | 0.78 (0.50-1.23) | 0.55 (0.29-1.06) | 0.89 (0.53-1.48) |
| *PTrend* | *0.409* | *0.142* | *0.738* |

**Abbreviations:** AOR, Adjusted Odds Ratio; MET, Metabolic Equivalent; OR, Odds Ratio

a Adjusted for age-group, alcohol consumption 10 years ago, family history of prostate cancer, body mass index 10 years ago, smoking status, index of relative socioeconomic disadvantage, energy intake 10 years ago, lifetime occupational physical activity, and total recreational physical activity in all previous age periods. Moderate and vigorous intensity physical activity and resistance training were mutually adjusted.
